# Supplementary material for: What characterizes effective tooth brushing of daily users of powered versus manual toothbrushes?
Source: PubMed Central journal article supplement (PMC8762860; doi:10.1186/s12903-022-02045-0), 2022-01-16
Supplement: 12903_2022_2045_MOESM1_ESM.pdf [file 12903_2022_2045_MOESM1_ESM.pdf]

## Flow diagram based on the diagram from Petker et al. (2019)

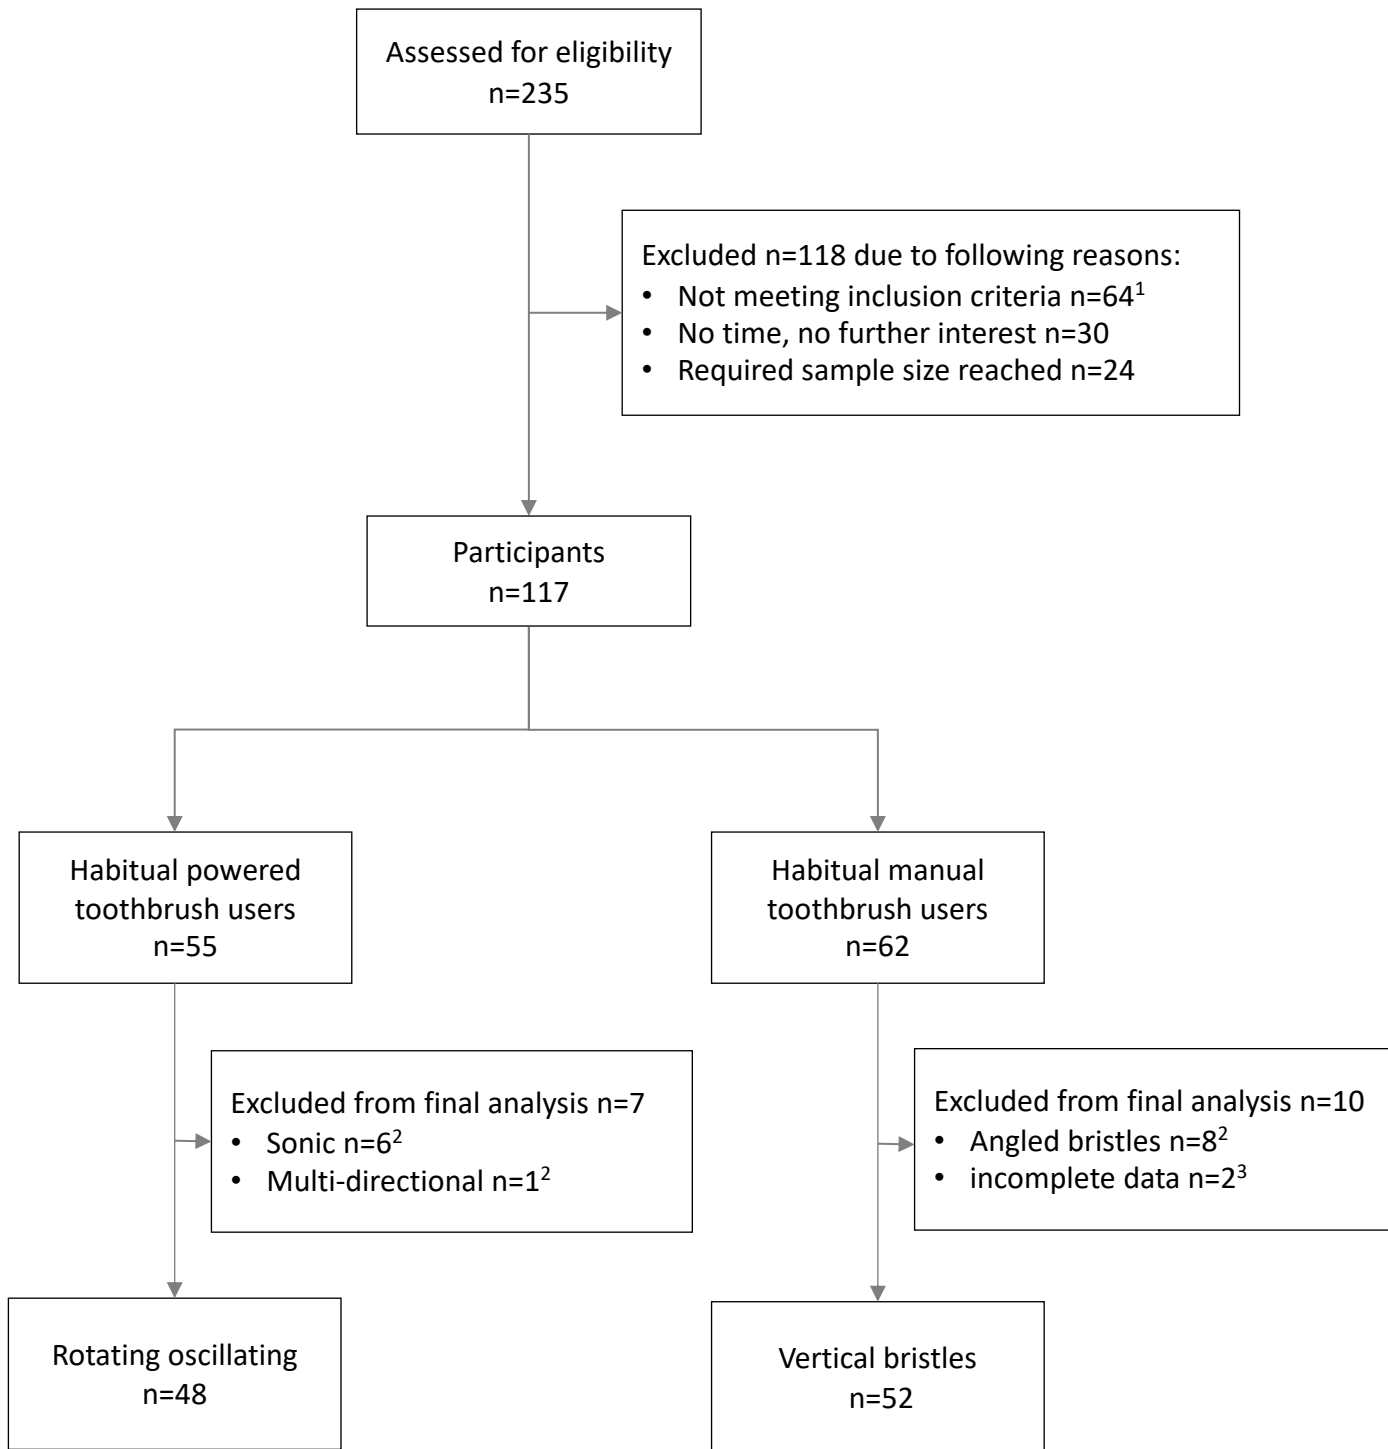

<sup>1</sup> For detailed information see flow diagram in Petker et al. (2019).

<sup>2</sup> Participants were excluded in order to reduce unsystematic variance.

<sup>3</sup> Investigation had to be interrupted due to technical difficulties.
